# Supplementary material
Source: MDPI journal article supplement (https://www.mdpi.com/2073-4352/11/1/33)
Supplement: s1 [file s1]

# Supplementary Materials: Top-Down Synthesis of a Lamivudine-Zidovudine Nano Co-Crystal

Bwalya A. Witika <sup>1,2</sup>, Vincent J. Smith <sup>3</sup> and Roderick B. Walker <sup>1,\*</sup>

Division of Pharmaceutics, Faculty of Pharmacy, Rhodes University, Makhanda 6140, South Africa; bwitika@ddtcollegeofmedicine.com (B.A.W.); r.b.walker@ru.ac.za (R.B.W.).

<sup>2</sup> Department of Pharmacy, DDT College of Medicine, 00000 Gaborone, Botswana.

<sup>3</sup> Department of Chemistry, Faculty of Science, Rhodes University, Makhanda 6140, South Africa; v.smith@ru.ac.za (V.J.S.).

\* Correspondence: r.b.walker@ru.ac.za

## Supplementary Materials

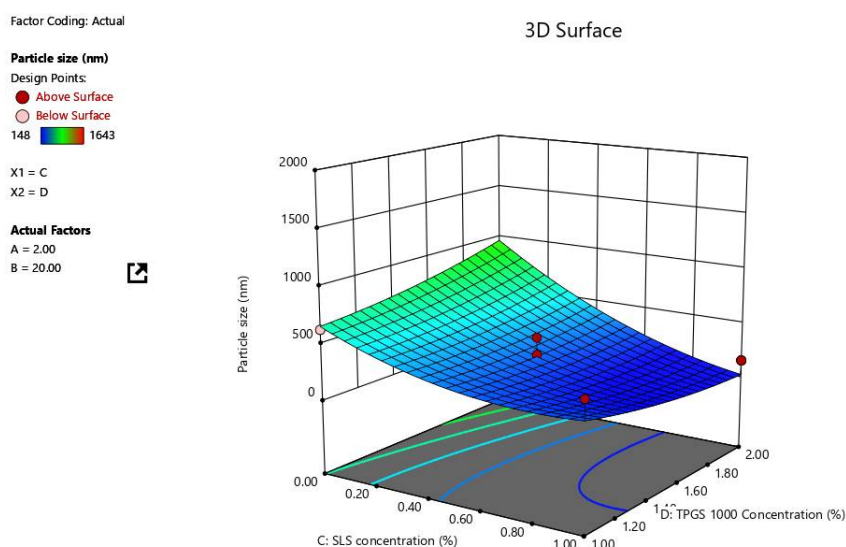

**Figure S1.** 3D response surface plot depicting the impact of SLS and TPGS concentration on PS.

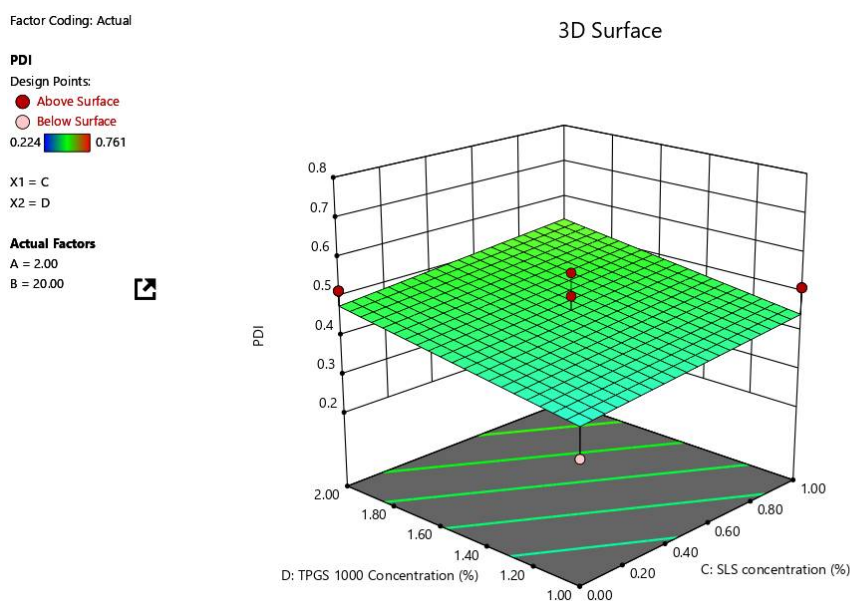

**Figure S2.** 3D response surface plot depicting the impact of SLS and TPGS concentration on PDI.

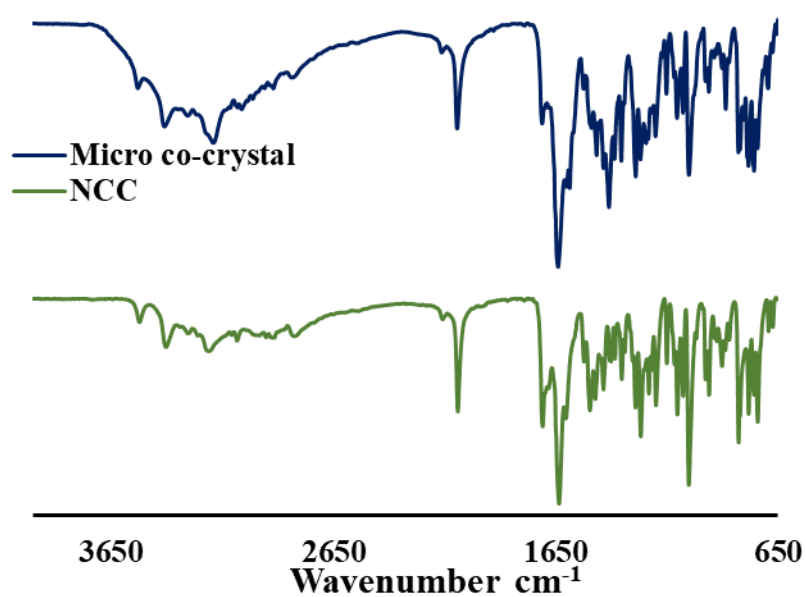

**Figure S3.** FTIR Spectra of the micro co-crystal (blue) [51] and OPT-NCC (green).

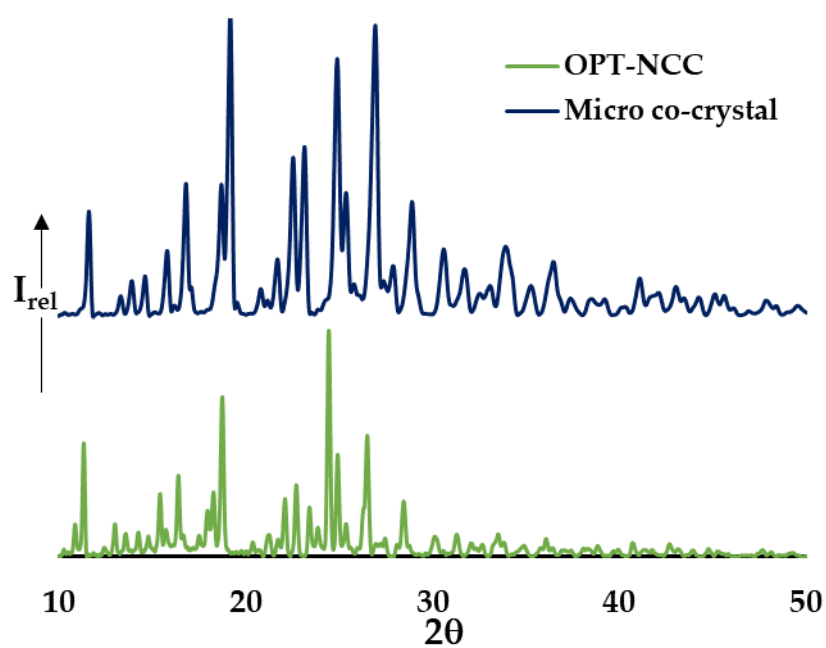

**Figure S4.** PXRD diffractogram for the micro co-crystal (blue) [51] and the OPT-NCC (green).

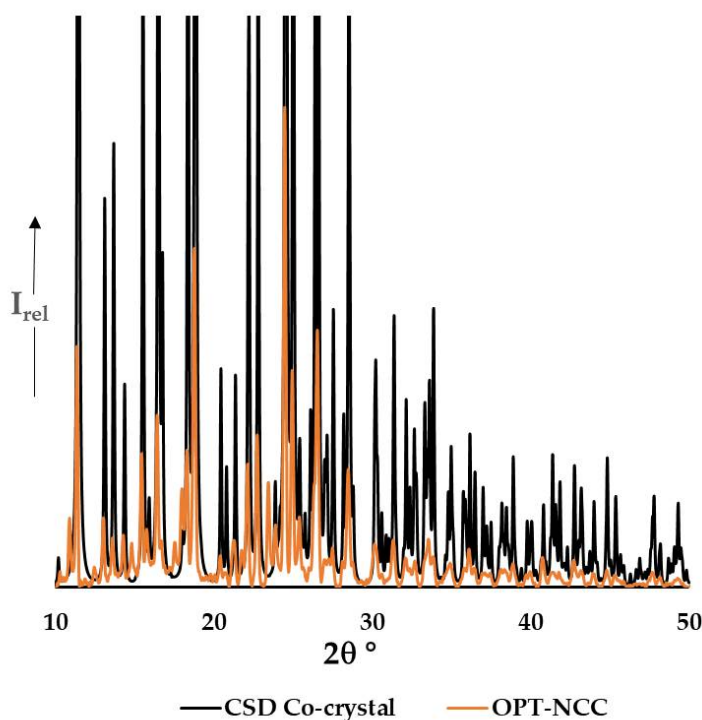

**Figure S5.** PXRD diffractograms of OPT-NCC (orange) and nano co-crystal (black) (Diffractogram obtained from CSD [73]). REFCODE: WOMHEM.

**Table S1.** In vitro cytotoxicity results.

| Compound         | Cell Viability % |
|------------------|------------------|
| OPT-NCC          | 74.7 ± 2.4       |
| Physical Mixture | 52.6 ± 5.1       |
| AZT              | 49.6 ± 6.2       |
| 3TC              | 62.3 ± 4.7       |

**Supplementary Materials:** Figure S1: 3D response surface plot depicting the impact of SLS and TPGS concentrations on PS. Figure S2: 3D response surface plot depicting the impact of SLS and TPGS concentrations on PDI. Figure S3: FTIR Spectra of the micro co-crystal (blue) [51] and OPT-NCC (green). Figure S4: PXRD diffractogram for the micro co-crystal (blue) [51] and the OPT-NCC (green). Figure S5: PXRD diffractograms of OPT-NCC (orange) and nano co-crystal (black) (Diffractogram obtained from CSD [73]). REFCODE: WOMHEM. Table S1: In vitro cytotoxicity results.

**Author Contributions:** BAW performed the experiments, analyzed the data, contributed to the conceptualization of research and wrote the manuscript. RBW supervised and contributed to the conceptualisation of the research, writing and editing of the manuscript. VJS contributed to the conceptualisation, supervision, bibliography research and proofreading of the manuscript.

**Funding:** This research did not receive any specific grant from funding agencies in the public, commercial, or not-for-profit sectors.

**Acknowledgments:** The authors acknowledge the National Research Foundation (NRF) (B.A.W), the Research Committee of Rhodes University (R.B.W and V.J.S) and Sandisa Imbewu fund (V.J.S) for financial assistance.

**Conflicts of Interest:** The authors declare no conflict of interest.

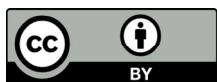

© 2020 by the authors. Submitted for possible open access publication under the terms and conditions of the Creative Commons Attribution (CC BY) license (<http://creativecommons.org/licenses/by/4.0/>).
